# Supplementary material
Source: publisher site journal article supplement (https://www.spandidos-publications.com/7633/downloadSupplementary)

Figure S1. FSHR membrane targeting and PrP<sup>c</sup> rescue in mouse granulosa cells. (A) Immunofluorescent detection of FSHR surface expression in mGCs. Mouse ovarian granulosa cells display distinct spindle-shaped morphologies with tightly packed cells in close proximity. FSHR-specific green fluorescence is primarily observed on the cell membranes, alongside DAPI-stained blue nuclei (scale bar, 50  $\mu$ m). FSHR, follicle stimulating hormone receptor. (B) PrP<sup>c</sup> expression is decreased by shRNA knockdown and rescued by overexpression. sh-2 and sh-3 knockdown groups show significant reduction of PrP<sup>c</sup> protein levels, rescue of PrP<sup>c</sup> expression is observed in both sh-2 + OE and sh-3 + OE groups PrP<sup>c</sup>, cellular prion protein; OE, overexpression; sh, short hairpin.

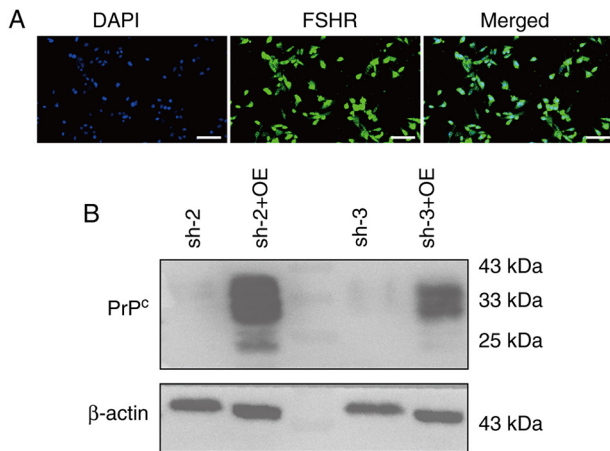

Supplement: Supplementary file 1 [file downloadSupplementary]
